# Supplementary material for: Six-coordinate high-spin iron(ii) complexes with bidentate PN ligands based on 2-aminopyridine – new Fe(ii) spin crossover systems
Source: Royal Society of Chemistry journal article supplement (doi:10.1039/c4dt00186a), 2014-01-01
Supplement: c4dt00186a1.pdf [file c4dt00186a1.pdf]

## Six-Coordinate High-Spin Iron(II) Complexes with Bidentate PN Ligands based on 2-Aminopyridine – New Fe(II) Spin Crossover Systems

Christian Holzacker, Maria José Calhorda, Adrià Gil, Maria Deus Carvalho, Liliana P. Ferreira, Margarida Godinho, Berthold Stöger, Kurt Mereiter, Mathias Weil, Danny Müller, Peter Weinberger, Ernst Pittenauer, Günter Allmaier, and Karl Kirchner\*

### Supporting Information

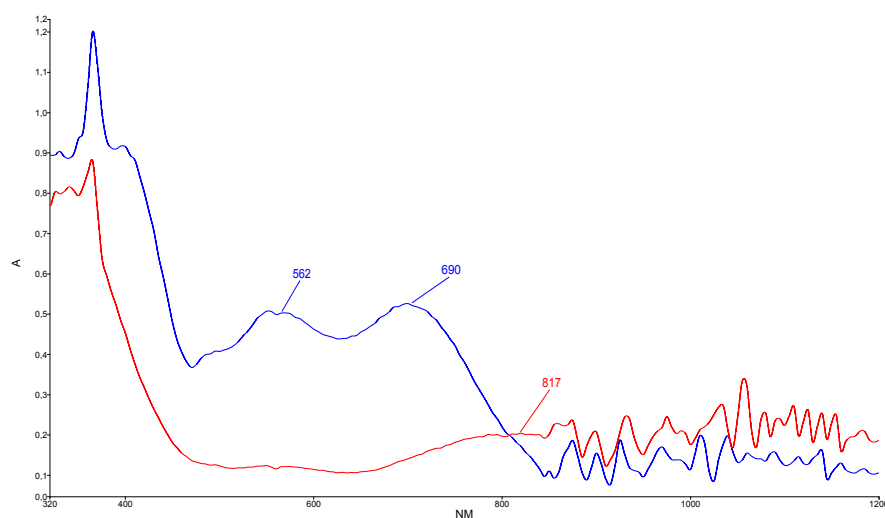

Figure S1. Experimental UV/Vis Spectra of **2a** at 123 K (blue) and 293 K (red).

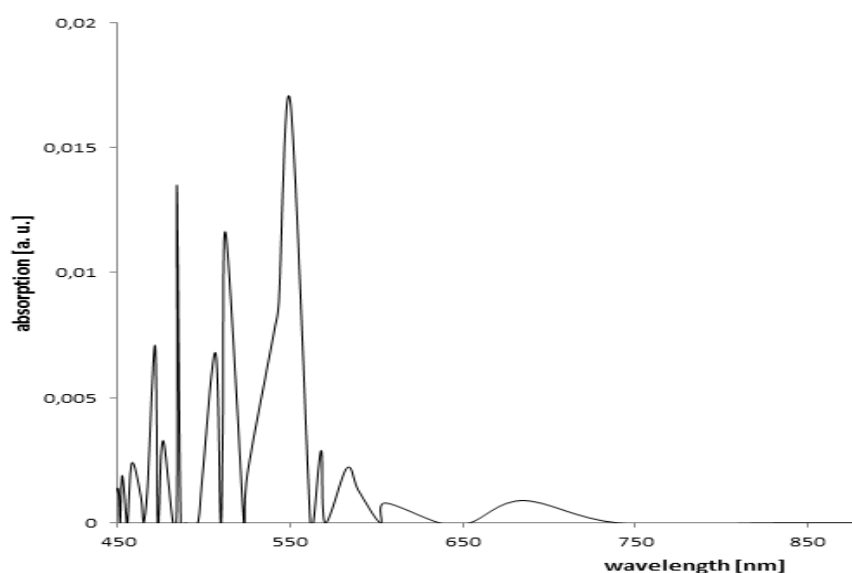

Figure S2. Calculated UV/Vis Spectra of **B<sup>LS</sup>**.

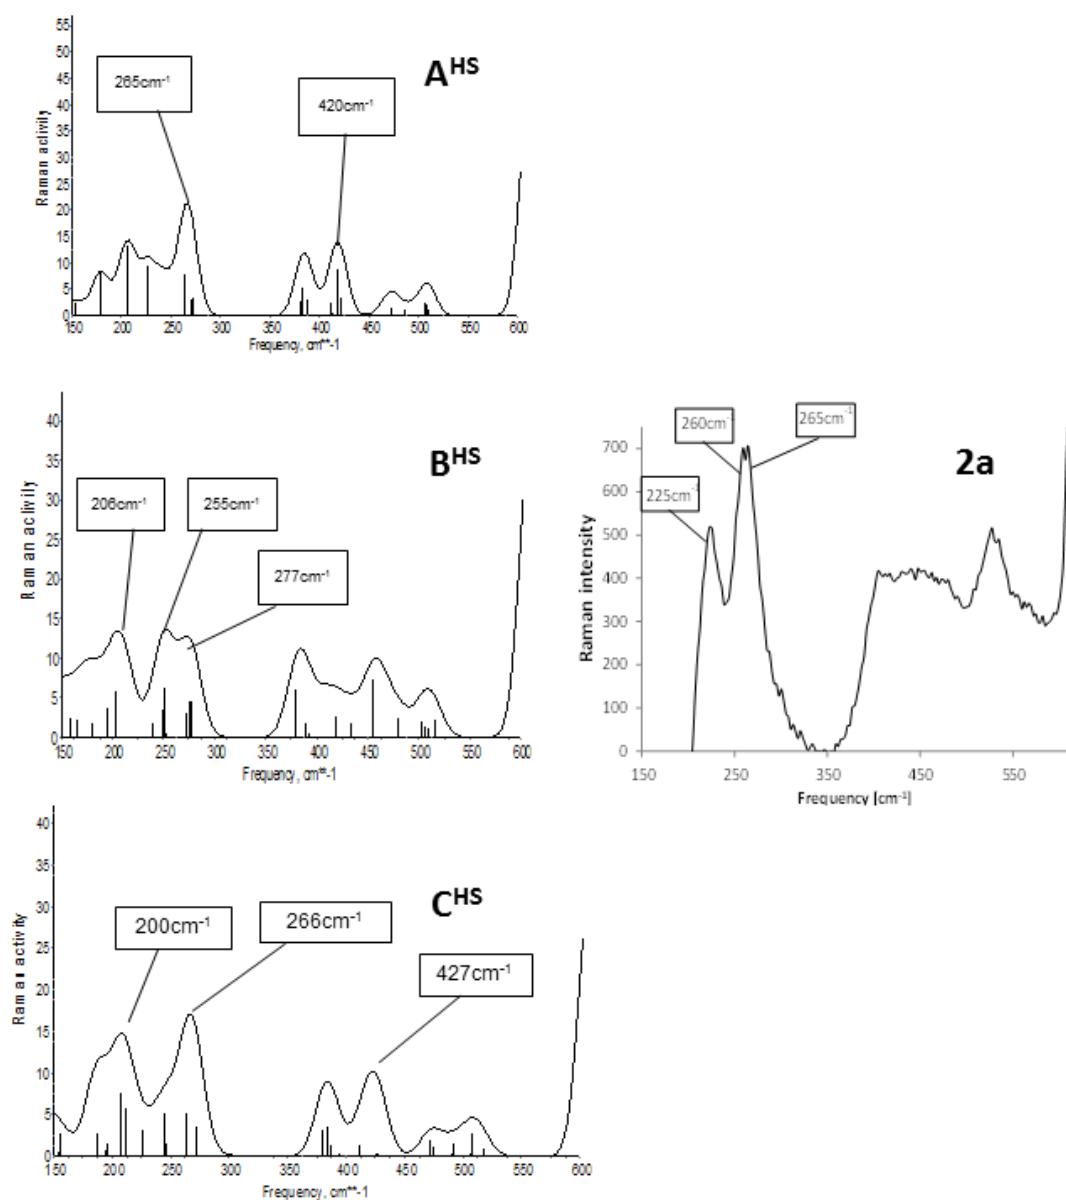

**Figure S3.** Calculated (left) and experimental (right) Raman spectra in the range of 150 – 600 cm<sup>-1</sup>.

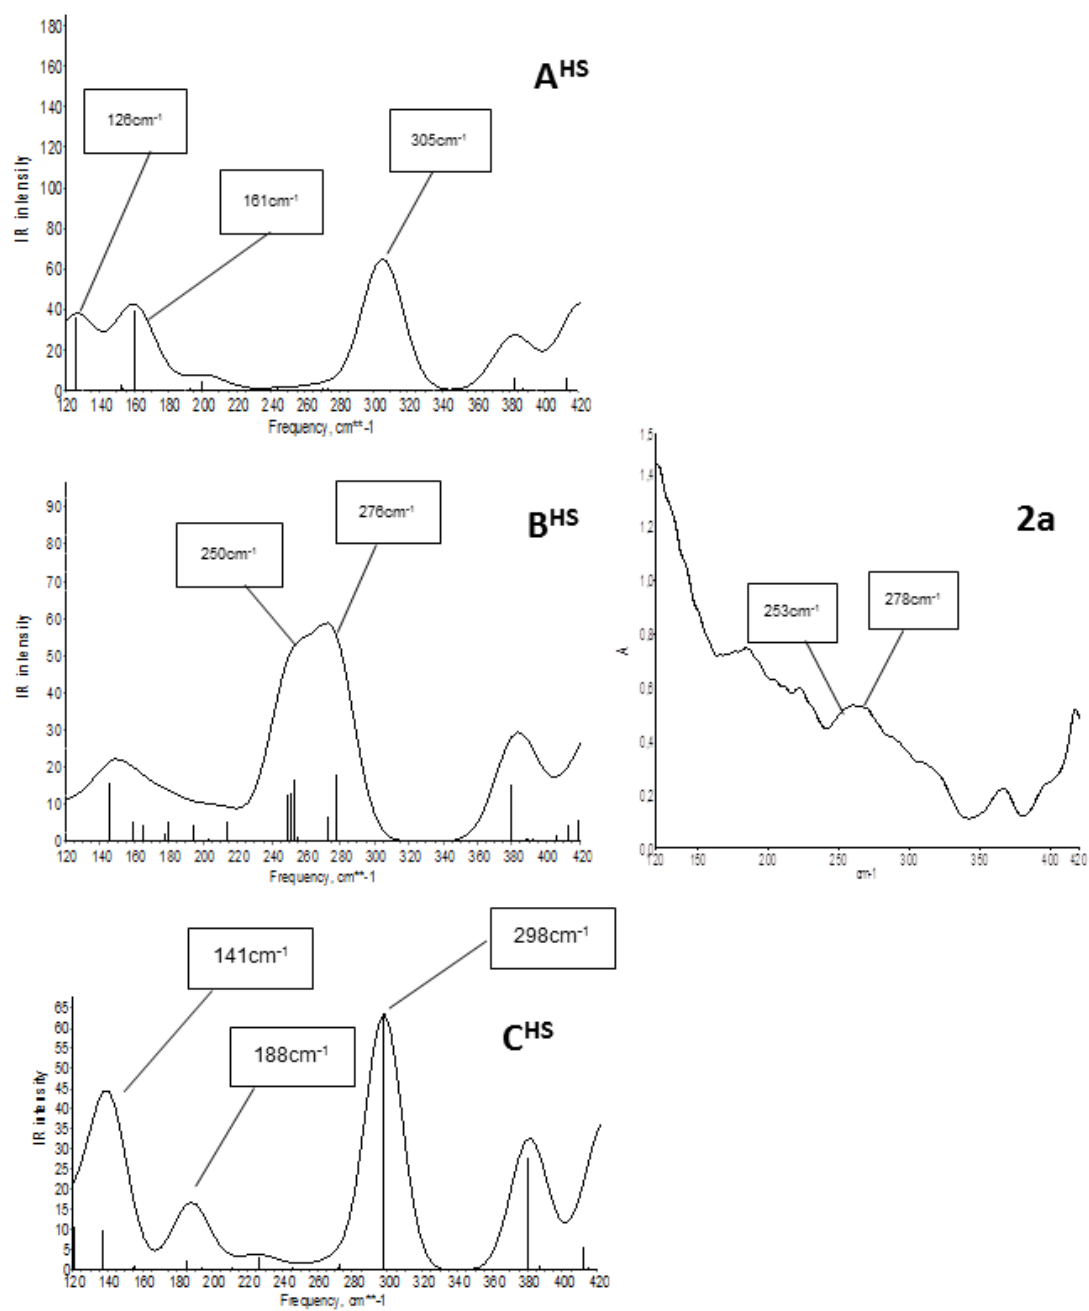

**Figure S4.** Calculated (left) and experimental (right) FIR spectra in the range of 120 - 420  $\text{cm}^{-1}$ .

**Table S1.** Energies of Isomers **A-E**. All calculations with the OPBE functional, Fe: sdd, other atoms 6-31g\*\* (gas phase). Reference point is *trans*-N,P,Cl-[Fe(PN)<sub>2</sub>Cl<sub>2</sub>] (**A<sup>HS</sup>**) set to 0.0 kcal/mol

| <i>trans</i> -N,P,Cl-[Fe(PN) <sub>2</sub> Cl <sub>2</sub> ] ( <b>A</b> )              |    | energies (hartrees) | ΔE (kcal/mol) | <i>cis</i> -N,P,Cl-[Fe(PN) <sub>2</sub> Cl <sub>2</sub> ] ( <b>B</b> )                | energies (hartrees) | ΔE (kcal/mol) |
|---------------------------------------------------------------------------------------|----|---------------------|---------------|---------------------------------------------------------------------------------------|---------------------|---------------|
| <b>A<sup>LS</sup></b> S = 0                                                           | ΔE | -3259.308981        | 20.3          | <b>B<sup>LS</sup></b> S = 0                                                           | -3259.322313        | 11.9          |
|                                                                                       | ΔH | -3258.709465        | 20.6          |                                                                                       | -3258.722469        | 12.5          |
|                                                                                       | ΔG | -3258.827230        | 26.2          |                                                                                       | -3258.837084        | 20.1          |
| <b>A<sup>HS</sup></b> S = 2                                                           | ΔE | -3259.341276        | <b>0.0</b>    | <b>B<sup>HS</sup></b> S = 2                                                           | -3259.337761        | 2.2           |
|                                                                                       | ΔH | -3258.742316        | <b>0.0</b>    |                                                                                       | -3258.738751        | 2.2           |
|                                                                                       | ΔG | -3258.869055        | <b>0.0</b>    |                                                                                       | -3258.863464        | 3.5           |
| <i>cis</i> -N,P, <i>trans</i> -Cl-[Fe(PN) <sub>2</sub> Cl <sub>2</sub> ] ( <b>C</b> ) |    |                     |               | <i>cis</i> -Cl,N, <i>trans</i> -P-[Fe(PN) <sub>2</sub> Cl <sub>2</sub> ] ( <b>D</b> ) |                     |               |
| <b>C<sup>LS</sup></b> S = 0                                                           | ΔE | -3259.319097        | 13.9          | <b>D<sup>LS</sup></b> S = 0                                                           | -3259.311458        | 18.7          |
|                                                                                       | ΔH | -3258.718977        | 14.6          |                                                                                       | -3258.712044        | 19.0          |
|                                                                                       | ΔG | -3258.832975        | 22.6          |                                                                                       | -3258.828212        | 25.6          |
| <b>C<sup>HS</sup></b> S = 2                                                           | ΔE | -3259.3424741       | -0.8          | <b>D<sup>HS</sup></b> S = 2                                                           | -3259.340594        | 0.4           |
|                                                                                       | ΔH | -3258.743551        | -0.8          |                                                                                       | -3258.741731        | 0.4           |
|                                                                                       | ΔG | -3258.868983        | 0.0           |                                                                                       | -3258.870643        | -1.0          |
| <i>cis</i> -Cl,P, <i>trans</i> -N-[Fe(PN) <sub>2</sub> Cl <sub>2</sub> ] ( <b>E</b> ) |    |                     |               |                                                                                       |                     |               |
| <b>E<sup>LS</sup></b> S = 0                                                           | ΔE | -3259.311946        | 18.4          |                                                                                       |                     |               |
|                                                                                       | ΔH | -3258.712250        | 18.9          |                                                                                       |                     |               |
|                                                                                       | ΔG | -3258.826297        | 27.1          |                                                                                       |                     |               |
| <b>E<sup>HS</sup></b> S = 2                                                           | ΔE | -3259.323620        | 11.1          |                                                                                       |                     |               |
|                                                                                       | ΔH | -3258.724845        | 11.0          |                                                                                       |                     |               |
|                                                                                       | ΔG | -3258.853566        | 9.7           |                                                                                       |                     |               |

Isomer A<sup>HS</sup>

|    |              |              |              |
|----|--------------|--------------|--------------|
| 26 | -0.028453000 | -0.014674000 | -0.002558000 |
| 15 | -1.041115000 | 2.139273000  | 1.258983000  |
| 17 | -0.693849000 | -1.572096000 | 1.601435000  |
| 7  | 1.653801000  | 0.801932000  | 1.381931000  |
| 6  | -1.909631000 | 2.240672000  | 2.892923000  |
| 6  | -1.051865000 | 4.432219000  | -0.422573000 |
| 1  | 0.029324000  | 4.321289000  | -0.465576000 |
| 6  | 1.651821000  | 2.076084000  | 1.818795000  |
| 6  | -2.243728000 | 1.047294000  | 3.554882000  |
| 1  | -2.019134000 | 0.090576000  | 3.085329000  |
| 6  | -1.812351000 | 3.543445000  | 0.356973000  |
| 6  | 3.911470000  | 1.870850000  | 2.636282000  |
| 1  | 4.790689000  | 2.299280000  | 3.118037000  |
| 6  | -3.215648000 | 3.668845000  | 0.354602000  |
| 1  | -3.826956000 | 2.991282000  | 0.950571000  |
| 6  | 3.900024000  | 0.532353000  | 2.224198000  |
| 1  | 4.754213000  | -0.123424000 | 2.377908000  |
| 6  | -2.788689000 | 3.504009000  | 4.780570000  |
| 1  | -3.002371000 | 4.463452000  | 5.253165000  |
| 6  | 2.782287000  | 2.652171000  | 2.442053000  |
| 1  | 2.756468000  | 3.690820000  | 2.770035000  |
| 6  | -3.837600000 | 4.671541000  | -0.392672000 |
| 1  | -4.924447000 | 4.758543000  | -0.376100000 |
| 6  | -3.071807000 | 5.563081000  | -1.150794000 |
| 1  | -3.557909000 | 6.347222000  | -1.731610000 |
| 6  | -2.846494000 | 1.086163000  | 4.817281000  |
| 1  | -3.100730000 | 0.151689000  | 5.318228000  |
| 6  | -2.190598000 | 3.471333000  | 3.519645000  |
| 1  | -1.960008000 | 4.410334000  | 3.015764000  |
| 6  | -1.680122000 | 5.437747000  | -1.162897000 |
| 1  | -1.074251000 | 6.120138000  | -1.759708000 |
| 6  | -3.118529000 | 2.309954000  | 5.432602000  |
| 1  | -3.587834000 | 2.337504000  | 6.416592000  |
| 6  | 2.749632000  | 0.056981000  | 1.604634000  |
| 1  | 2.679661000  | -0.976548000 | 1.271821000  |
| 7  | 0.505591000  | 2.822503000  | 1.646518000  |
| 15 | 1.012520000  | -2.141601000 | -1.256476000 |
| 17 | 0.607547000  | 1.534432000  | -1.625597000 |
| 7  | -1.700320000 | -0.812081000 | -1.403355000 |
| 6  | 1.984522000  | -2.191759000 | -2.833698000 |
| 6  | 0.906688000  | -4.476874000 | 0.357509000  |
| 1  | -0.171364000 | -4.332858000 | 0.369133000  |
| 6  | -1.666087000 | -2.059011000 | -1.910054000 |
| 6  | 2.494194000  | -0.993133000 | -3.359202000 |
| 1  | 2.320881000  | -0.057050000 | -2.830981000 |
| 6  | 1.720103000  | -3.590247000 | -0.369607000 |
| 6  | -3.911968000 | -1.848444000 | -2.763141000 |
| 1  | -4.772415000 | -2.264046000 | -3.288082000 |
| 6  | 3.117492000  | -3.762211000 | -0.327478000 |
| 1  | 3.769011000  | -3.089326000 | -0.884606000 |
| 6  | -3.935832000 | -0.537297000 | -2.271875000 |
| 1  | -4.800377000 | 0.109760000  | -2.402857000 |
| 6  | 2.893315000  | -3.388304000 | -4.750927000 |
| 1  | 3.050007000  | -4.324475000 | -5.288026000 |
| 6  | -2.771481000 | -2.618391000 | -2.590769000 |
| 1  | -2.718266000 | -3.635151000 | -2.978598000 |
| 6  | 3.682520000  | -4.806476000 | 0.408390000  |
| 1  | 4.765998000  | -4.928638000 | 0.423332000  |
| 6  | 2.864507000  | -5.695198000 | 1.113101000  |
| 1  | 3.306148000  | -6.512436000 | 1.683747000  |
| 6  | 3.198113000  | -0.995754000 | -4.569019000 |
| 1  | 3.585968000  | -0.056870000 | -4.965029000 |
| 6  | 2.197124000  | -3.391744000 | -3.541264000 |
| 1  | 1.837194000  | -4.339565000 | -3.139886000 |
| 6  | 1.477817000  | -5.524957000 | 1.084675000  |
| 1  | 0.831268000  | -6.205393000 | 1.639595000  |
| 6  | 3.396367000  | -2.188358000 | -5.267645000 |
| 1  | 3.942277000  | -2.187537000 | -6.211641000 |
| 6  | -2.806742000 | -0.077000000 | -1.603640000 |
| 1  | -2.764346000 | 0.936344000  | -1.210645000 |
| 7  | -0.513184000 | -2.798159000 | -1.750373000 |
| 1  | 0.524252000  | 3.733336000  | 2.088084000  |
| 1  | -0.517624000 | -3.695129000 | -2.219138000 |

Isomer A<sup>LS</sup>

|    |              |              |               |
|----|--------------|--------------|---------------|
| 26 | 0.000255000  | 0.000184000  | -0.000107000  |
| 15 | -0.891840000 | 1.864422000  | 0.896904000   |
| 17 | -0.627392000 | -1.304652000 | 1.793759000   |
| 7  | 1.607656000  | 0.623069000  | 1.038772000   |
| 6  | -1.824643000 | 1.805988000  | 2.492666000   |
| 6  | -1.078664000 | 4.048354000  | -0.896678000  |
| 1  | -0.044624000 | 3.811723000  | -1.135240000  |
| 6  | 1.712331000  | 1.927153000  | 1.411157000   |
| 6  | -2.905345000 | 0.914144000  | 2.608350000   |
| 1  | -3.128637000 | 0.226280000  | 1.796052000   |
| 6  | -1.766143000 | 3.267648000  | 0.053330000   |
| 6  | 3.978846000  | 1.641307000  | 2.181637000   |
| 1  | 4.902670000  | 2.046139000  | 2.594087000   |
| 6  | -3.117029000 | 3.560740000  | 0.319579000   |
| 1  | -3.667463000 | 2.983695000  | 1.059868000   |
| 6  | 3.840202000  | 0.274906000  | 1.915706000   |
| 1  | 4.634223000  | -0.437345000 | 2.129060000   |
| 6  | -2.274998000 | 2.595409000  | 4.749743000   |
| 1  | -2.016835000 | 3.245908000  | 5.585955000   |
| 6  | 2.894380000  | 2.474151000  | 1.944710000   |
| 1  | 2.932319000  | 3.535293000  | 2.186385000   |
| 6  | -3.762306000 | 4.606740000  | -0.345765000  |
| 1  | -4.807249000 | 4.821813000  | -0.120212000  |
| 6  | -3.070833000 | 5.379534000  | -1.282791000  |
| 1  | -3.574674000 | 6.197592000  | -1.798444000  |
| 6  | -3.673412000 | 0.881857000  | 3.775487000   |
| 1  | -4.505971000 | 0.182042000  | 3.851572000   |
| 6  | -1.515188000 | 2.641170000  | 3.577714000   |
| 1  | -0.671139000 | 3.327188000  | 3.521611000   |
| 6  | -1.728826000 | 5.097084000  | -1.552544000  |
| 1  | -1.180402000 | 5.690425000  | -2.284765000  |
| 6  | -3.360511000 | 1.720332000  | 4.848882000   |
| 1  | -3.953356000 | 1.685112000  | 5.763259000   |
| 6  | 2.648503000  | -0.176661000 | 1.362965000   |
| 1  | 2.498884000  | -1.232734000 | 1.173851000   |
| 7  | 0.577706000  | 2.677717000  | 1.267189000   |
| 15 | 0.892305000  | -1.864094000 | -0.897095000  |
| 17 | 0.627895000  | 1.305062000  | -1.793943000  |
| 7  | -1.607137000 | -0.622688000 | -1.038997000  |
| 6  | 1.825019000  | -1.805715000 | -2.492911000  |
| 6  | 1.079208000  | -4.048024000 | 0.896488000   |
| 1  | 0.045166000  | -3.811418000 | 1.135067000   |
| 6  | -1.711866000 | -1.926794000 | -1.411298000  |
| 6  | 2.905692000  | -0.913849000 | -2.608689000  |
| 1  | 3.129007000  | -0.225893000 | -1.796430000  |
| 6  | 1.766650000  | -3.267300000 | -0.053531000  |
| 6  | -3.978345000 | -1.640881000 | -2.181857000  |
| 1  | -4.902182000 | -2.045694000 | -2.594299000  |
| 6  | 3.117534000  | -3.560331000 | -0.319817000  |
| 1  | 3.667938000  | -2.983313000 | -1.060120000  |
| 6  | -3.839630000 | -0.274465000 | -1.916036000  |
| 1  | -4.633603000 | -0.437813000 | -2.129477000  |
| 6  | 2.275278000  | -2.595223000 | -4.749976000  |
| 1  | 2.017092000  | -3.245768000 | -5.586145000  |
| 6  | -2.893932000 | -2.473768000 | -1.944838000  |
| 1  | -2.931922000 | -3.534926000 | -2.186435000  |
| 6  | 3.762850000  | -4.606353000 | 0.345513000   |
| 1  | 4.807792000  | -4.821404000 | 0.119935000   |
| 6  | 3.071416000  | -5.379160000 | 1.282556000   |
| 1  | 3.575286000  | -6.197208000 | 1.798198000   |
| 6  | 3.673696000  | -0.881589000 | -3.775868000  |
| 1  | 4.506233000  | -0.181756000 | -3.852027000  |
| 6  | 1.515532000  | -2.640955000 | -3.577905000  |
| 1  | 0.671509000  | -3.327000000 | -3.521726000  |
| 6  | 1.729408000  | -5.096741000 | 1.552380000   |
| 1  | 1.181013000  | -5.690096000 | 2.284569000   |
| 6  | 3.360761000  | -1.720118000 | -4.849210000  |
| 1  | 3.953556000  | -1.684920000 | -5.763621000  |
| 6  | -2.647922000 | 0.177079000  | -1.362395000  |
| 1  | -2.498239000 | 1.233159000  | -1.174268000  |
| 7  | -0.577271000 | -2.677391000 | -1.267268000  |
| 1  | 0.614185000  | 3.657005000  | 1.510355000   |
| 1  | -0.613773000 | -3.656685000 | -1.510406000S |

Isomer B<sup>HS</sup>

|    |              |              |              |
|----|--------------|--------------|--------------|
| 26 | -0.221509000 | 0.116599000  | 0.011838000  |
| 15 | -1.373177000 | 2.114377000  | 1.050467000  |
| 17 | -0.161343000 | 1.121371000  | -2.078515000 |
| 7  | -0.263247000 | -0.335374000 | 2.356200000  |
| 6  | -3.082336000 | 2.636433000  | 0.603523000  |
| 6  | 0.085365000  | 4.104361000  | 2.486912000  |
| 1  | 0.079904000  | 3.409772000  | 3.326326000  |
| 6  | -1.091028000 | 0.368799000  | 3.151028000  |
| 6  | -3.737873000 | 1.985999000  | -0.454439000 |
| 1  | -3.230266000 | 1.188841000  | -0.992161000 |
| 6  | -0.566730000 | 3.755374000  | 1.292237000  |
| 6  | -0.945492000 | -1.289610000 | 4.893558000  |
| 1  | -1.219007000 | -1.655273000 | 5.883449000  |
| 6  | -0.549233000 | 4.666468000  | 0.218860000  |
| 1  | -1.043228000 | 4.414194000  | -0.718910000 |
| 6  | -0.091955000 | -2.029933000 | 4.066614000  |
| 1  | 0.323233000  | -2.985694000 | 4.378263000  |
| 6  | -5.051514000 | 4.021044000  | 0.954978000  |
| 1  | -5.557241000 | 4.817980000  | 1.501243000  |
| 6  | -1.453343000 | -0.081625000 | 4.439522000  |
| 1  | -2.128175000 | 0.511200000  | 5.056054000  |
| 6  | 0.093268000  | 5.899215000  | 0.348256000  |
| 1  | 0.091642000  | 6.596149000  | -0.490358000 |
| 6  | 0.733793000  | 6.242015000  | 1.543807000  |
| 1  | 1.233310000  | 7.205937000  | 1.642070000  |
| 6  | -5.041607000 | 2.355539000  | -0.800795000 |
| 1  | -5.540615000 | 1.844631000  | -1.624356000 |
| 6  | -3.745791000 | 3.665840000  | 1.298851000  |
| 1  | -3.238747000 | 4.209688000  | 2.096698000  |
| 6  | 0.728511000  | 5.340393000  | 2.611046000  |
| 1  | 1.221799000  | 5.599400000  | 3.548750000  |
| 6  | -5.701612000 | 3.365392000  | -0.096759000 |
| 1  | -6.719244000 | 3.647743000  | -0.368563000 |
| 6  | 0.205729000  | -1.509050000 | 2.813229000  |
| 1  | 0.845793000  | -2.054561000 | 2.122831000  |
| 7  | -1.570941000 | 1.573824000  | 2.681617000  |
| 15 | 2.411050000  | 0.609954000  | 0.306556000  |
| 17 | -2.228255000 | -1.157139000 | 0.113265000  |
| 7  | 0.980831000  | -1.757735000 | -0.899118000 |
| 6  | 3.418753000  | 2.037219000  | -0.296433000 |
| 6  | 3.966279000  | -1.020846000 | 2.066371000  |
| 1  | 4.025305000  | -1.737074000 | 1.247753000  |
| 6  | 2.253955000  | -1.623853000 | -1.315556000 |
| 6  | 2.841783000  | 2.936449000  | -1.210585000 |
| 1  | 1.809289000  | 2.795136000  | -1.523559000 |
| 6  | 3.286739000  | 0.194028000  | 1.880413000  |
| 6  | 2.078004000  | -3.558929000 | -2.737422000 |
| 1  | 2.510955000  | -4.250894000 | -3.460432000 |
| 6  | 3.219191000  | 1.102493000  | 2.953663000  |
| 1  | 2.698968000  | 2.051828000  | 2.831730000  |
| 6  | 0.759972000  | -3.715250000 | -2.293546000 |
| 1  | 0.127388000  | -4.525335000 | -2.650102000 |
| 6  | 5.507486000  | 3.280251000  | -0.429329000 |
| 1  | 6.544942000  | 3.410776000  | -0.119563000 |
| 6  | 2.839075000  | -2.505988000 | -2.250052000 |
| 1  | 3.867486000  | -2.355674000 | -2.577036000 |
| 6  | 3.830231000  | 0.806658000  | 4.173636000  |
| 1  | 3.775853000  | 1.525414000  | 4.991869000  |
| 6  | 4.507447000  | -0.405280000 | 4.348497000  |
| 1  | 4.980877000  | -0.636227000 | 5.302906000  |
| 6  | 3.596440000  | 3.993256000  | -1.727056000 |
| 1  | 3.136170000  | 4.682472000  | -2.435403000 |
| 6  | 4.760032000  | 2.220492000  | 0.091125000  |
| 1  | 5.221461000  | 1.542894000  | 0.807900000  |
| 6  | 4.571743000  | -1.317197000 | 3.292155000  |
| 1  | 5.098065000  | -2.264117000 | 3.417668000  |
| 6  | 4.927524000  | 4.169545000  | -1.339159000 |
| 1  | 5.511531000  | 4.997499000  | -1.742317000 |
| 6  | 0.260514000  | -2.785239000 | -1.387773000 |
| 1  | -0.768388000 | -2.822972000 | -1.029341000 |
| 7  | 3.005145000  | -0.598313000 | -0.777991000 |
| 1  | -2.281363000 | 2.008839000  | 3.255783000  |
| 1  | 3.929237000  | -0.474489000 | -1.170363000 |

## BLS

|    |              |              |              |
|----|--------------|--------------|--------------|
| 26 | -0.035512000 | 0.165898000  | 0.260376000  |
| 15 | -1.011254000 | 1.903510000  | 1.070342000  |
| 17 | -0.154401000 | 1.028451000  | -1.892286000 |
| 7  | -0.133462000 | -0.575961000 | 2.079364000  |
| 6  | -2.660762000 | 2.578275000  | 0.558399000  |
| 6  | 0.127281000  | 4.031764000  | 2.628210000  |
| 1  | -0.079084000 | 3.426196000  | 3.510435000  |
| 6  | -0.871385000 | 0.083689000  | 3.015348000  |
| 6  | -3.217496000 | 2.291197000  | -0.696696000 |
| 1  | -2.689385000 | 1.625274000  | -1.373310000 |
| 6  | -0.180666000 | 3.534320000  | 1.351300000  |
| 6  | -0.669723000 | -1.739363000 | 4.585339000  |
| 1  | -0.890228000 | -2.187728000 | 5.553612000  |
| 6  | 0.087957000  | 4.335599000  | 0.226369000  |
| 1  | -0.136033000 | 3.959404000  | -0.770640000 |
| 6  | 0.111096000  | -2.410285000 | 3.638298000  |
| 1  | 0.527920000  | -3.396369000 | 3.831080000  |
| 6  | -4.578787000 | 3.991924000  | 1.063627000  |
| 1  | -5.099223000 | 4.657983000  | 1.752556000  |
| 6  | -1.157726000 | -0.478237000 | 4.273261000  |
| 1  | -1.758908000 | 0.084928000  | 4.985450000  |
| 6  | 0.646190000  | 5.605368000  | 0.381741000  |
| 1  | 0.851265000  | 6.212576000  | -0.500063000 |
| 6  | 0.944602000  | 6.096675000  | 1.657134000  |
| 1  | 1.376029000  | 7.091005000  | 1.775064000  |
| 6  | -4.443238000 | 2.854852000  | -1.063431000 |
| 1  | -4.863421000 | 2.622796000  | -2.042381000 |
| 6  | -3.343175000 | 3.450777000  | 1.426717000  |
| 1  | -2.908617000 | 3.743543000  | 2.383142000  |
| 6  | 0.686696000  | 5.305653000  | 2.779144000  |
| 1  | 0.914079000  | 5.680052000  | 3.778134000  |
| 6  | -5.132499000 | 3.694633000  | -0.185104000 |
| 1  | -6.092862000 | 4.123375000  | -0.473240000 |
| 6  | 0.347238000  | -1.792519000 | 2.418219000  |
| 1  | 0.936847000  | -2.284109000 | 1.652390000  |
| 7  | -1.296861000 | 1.348452000  | 2.687931000  |
| 15 | 2.070236000  | 0.672909000  | 0.327368000  |
| 17 | -2.235634000 | -0.654714000 | 0.141793000  |
| 7  | 0.678456000  | -1.572266000 | -0.672460000 |
| 6  | 3.007935000  | 2.121520000  | -0.357389000 |
| 6  | 4.010468000  | -0.608265000 | 1.992839000  |
| 1  | 4.274692000  | -1.194507000 | 1.114330000  |
| 6  | 1.950568000  | -1.568741000 | -1.141520000 |
| 6  | 2.959451000  | 2.360934000  | -1.745089000 |
| 1  | 2.326526000  | 1.738189000  | -2.373633000 |
| 6  | 2.994459000  | 0.358574000  | 1.909208000  |
| 6  | 1.615441000  | -3.631510000 | -2.337072000 |
| 1  | 1.981716000  | -4.422737000 | -2.991427000 |
| 6  | 2.663629000  | 1.081421000  | 3.069448000  |
| 1  | 1.874214000  | 1.827907000  | 3.037019000  |
| 6  | 0.309367000  | -3.655336000 | -1.836666000 |
| 1  | -0.384484000 | -4.456629000 | -2.081671000 |
| 6  | 4.534151000  | 4.003251000  | -0.124142000 |
| 1  | 5.149111000  | 4.636466000  | 0.515959000  |
| 6  | 2.450771000  | -2.581147000 | -1.983303000 |
| 1  | 3.478245000  | -2.529165000 | -2.340265000 |
| 6  | 3.341096000  | 0.856602000  | 4.270656000  |
| 1  | 3.070995000  | 1.432053000  | 5.156723000  |
| 6  | 4.352964000  | -0.105290000 | 4.339897000  |
| 1  | 4.877555000  | -0.284984000 | 5.278500000  |
| 6  | 3.694282000  | 3.407476000  | -2.307540000 |
| 1  | 3.643639000  | 3.577226000  | -3.383576000 |
| 6  | 3.803495000  | 2.956421000  | 0.445306000  |
| 1  | 3.870299000  | 2.789769000  | 1.517301000  |
| 6  | 4.681830000  | -0.839133000 | 3.197320000  |
| 1  | 5.465372000  | -1.596513000 | 3.239710000  |
| 6  | 4.484475000  | 4.232107000  | -1.501239000 |
| 1  | 5.059542000  | 5.046130000  | -1.943746000 |
| 6  | -0.109215000 | -2.611033000 | -1.020623000 |
| 1  | -1.123789000 | -2.552177000 | -0.629462000 |
| 7  | 2.736766000  | -0.527398000 | -0.727391000 |
| 1  | -2.050710000 | 1.723123000  | 3.247950000  |
| 1  | 3.638404000  | -0.404025000 | -1.166415000 |

## CHS

|    |              |              |              |
|----|--------------|--------------|--------------|
| 26 | 0.106463000  | -0.288242000 | 0.084175000  |
| 15 | 1.958030000  | 0.529729000  | 1.673156000  |
| 17 | -0.840191000 | -2.032488000 | 1.321406000  |
| 7  | -0.948360000 | 1.190514000  | 1.662845000  |
| 6  | 3.517391000  | 1.242023000  | 1.014972000  |
| 6  | 3.498737000  | 0.326648000  | 4.074979000  |
| 1  | 3.964944000  | 1.270578000  | 3.791542000  |
| 6  | -0.200900000 | 2.079472000  | 2.341978000  |
| 6  | 3.581382000  | 2.551333000  | 0.509273000  |
| 1  | 2.694564000  | 3.180721000  | 0.531712000  |
| 6  | 2.547878000  | -0.279184000 | 3.229580000  |
| 6  | -2.165949000 | 3.184140000  | 3.193971000  |
| 1  | -2.632832000 | 3.971706000  | 3.785963000  |
| 6  | 1.985070000  | -1.509892000 | 3.607828000  |
| 1  | 1.240458000  | -1.982982000 | 2.969143000  |
| 6  | -2.945970000 | 2.229730000  | 2.529216000  |
| 1  | -4.032222000 | 2.233185000  | 2.590537000  |
| 6  | 5.838617000  | 0.907819000  | 0.360527000  |
| 1  | 6.714376000  | 0.260718000  | 0.303456000  |
| 6  | -0.782666000 | 3.110972000  | 3.112779000  |
| 1  | -0.151595000 | 3.826559000  | 3.639012000  |
| 6  | 2.366856000  | -2.119843000 | 4.808010000  |
| 1  | 1.922400000  | -3.075426000 | 5.087358000  |
| 6  | 3.306611000  | -1.510673000 | 5.642376000  |
| 1  | 3.601784000  | -1.987828000 | 6.577460000  |
| 6  | 4.768754000  | 3.035267000  | -0.047488000 |
| 1  | 4.802901000  | 4.055149000  | -0.431786000 |
| 6  | 4.657724000  | 0.420955000  | 0.924847000  |
| 1  | 4.629095000  | -0.598747000 | 1.308133000  |
| 6  | 3.871927000  | -0.284388000 | 5.273317000  |
| 1  | 4.609679000  | 0.194969000  | 5.917877000  |
| 6  | 5.900225000  | 2.218641000  | -0.123030000 |
| 1  | 6.823776000  | 2.598943000  | -0.560103000 |
| 6  | -2.282834000 | 1.259539000  | 1.784024000  |
| 1  | -2.832643000 | 0.477344000  | 1.262684000  |
| 7  | 1.172624000  | 1.952541000  | 2.274084000  |
| 15 | 1.099488000  | -2.133408000 | -1.400172000 |
| 17 | 0.586268000  | 1.629524000  | -1.171656000 |
| 7  | -1.547743000 | -0.770636000 | -1.581944000 |
| 6  | 2.178850000  | -1.923381000 | -2.887639000 |
| 6  | 0.956029000  | -4.701928000 | -0.189729000 |
| 1  | -0.123610000 | -4.617079000 | -0.292048000 |
| 6  | -1.501953000 | -1.940116000 | -2.245601000 |
| 6  | 2.543561000  | -0.622704000 | -3.274100000 |
| 1  | 2.216359000  | 0.228123000  | -2.677872000 |
| 6  | 1.783684000  | -3.668660000 | -0.660491000 |
| 6  | -3.661676000 | -1.539870000 | -3.237729000 |
| 1  | -4.486555000 | -1.852851000 | -3.878285000 |
| 3  | 3.174829000  | -3.769693000 | -0.467277000 |
| 1  | 3.835569000  | -2.979882000 | -0.823664000 |
| 6  | -3.690379000 | -0.300394000 | -2.586659000 |
| 1  | -4.521752000 | 0.391105000  | -2.706287000 |
| 6  | 3.357930000  | -2.805158000 | -4.826425000 |
| 1  | 3.676403000  | -3.658165000 | -5.426822000 |
| 6  | -2.559698000 | -2.368106000 | -3.079212000 |
| 1  | -2.501285000 | -3.327596000 | -3.592209000 |
| 6  | 3.723500000  | -4.887363000 | 0.164961000  |
| 1  | 4.803389000  | -4.951948000 | 0.301612000  |
| 6  | 2.894605000  | -5.920431000 | 0.614098000  |
| 1  | 3.324191000  | -6.794226000 | 1.104517000  |
| 6  | 3.310508000  | -0.419630000 | -4.426560000 |
| 1  | 3.587497000  | 0.595237000  | -4.712968000 |
| 6  | 2.596245000  | -3.014595000 | -3.675408000 |
| 1  | 2.343060000  | -4.033627000 | -3.381985000 |
| 6  | 1.512202000  | -5.822061000 | 0.434948000  |
| 1  | 0.856145000  | -6.616904000 | 0.791049000  |
| 6  | 3.717400000  | -1.506048000 | -5.204238000 |
| 1  | 4.315037000  | -1.345120000 | -6.102130000 |
| 6  | -2.607629000 | 0.028874000  | -1.777260000 |
| 1  | -2.562527000 | 0.987550000  | -1.262842000 |
| 7  | -0.374110000 | -2.722975000 | -2.097025000 |
| 1  | -0.330319000 | -3.528852000 | -2.708103000 |
| 1  | 1.688558000  | 2.561712000  | 2.896473000  |

## CLS

|    |              |              |              |
|----|--------------|--------------|--------------|
| 26 | 0.180066000  | -0.186030000 | 0.222336000  |
| 15 | 1.995186000  | 0.303025000  | 1.333593000  |
| 17 | -0.475105000 | -1.329971000 | 2.134009000  |
| 7  | -0.498081000 | 1.523025000  | 1.113628000  |
| 6  | 3.428226000  | 1.339613000  | 0.758241000  |
| 6  | 2.457726000  | -1.247776000 | 3.677025000  |
| 1  | 1.529750000  | -0.819325000 | 4.047172000  |
| 6  | 0.149071000  | 1.988838000  | 2.212569000  |
| 6  | 3.581823000  | 1.672321000  | -0.595629000 |
| 1  | 2.851566000  | 1.315984000  | -1.317404000 |
| 6  | 2.915722000  | -0.897499000 | 2.395156000  |
| 6  | -1.417397000 | 3.803730000  | 2.464557000  |
| 1  | -1.785152000 | 4.674117000  | 3.007863000  |
| 6  | 4.104059000  | -1.477897000 | 1.916416000  |
| 1  | 4.493221000  | -1.198393000 | 0.939078000  |
| 6  | -2.019053000 | 3.393235000  | 1.269473000  |
| 1  | -2.853271000 | 3.935456000  | 0.829828000  |
| 6  | 5.417070000  | 2.651154000  | 1.276557000  |
| 1  | 6.131367000  | 3.025100000  | 2.010963000  |
| 6  | -0.313319000 | 3.107075000  | 2.935194000  |
| 1  | 0.213369000  | 3.423470000  | 3.834073000  |
| 6  | 4.812904000  | -2.394479000 | 2.697010000  |
| 1  | 5.733108000  | -2.833396000 | 2.310325000  |
| 6  | 4.352601000  | -2.735329000 | 3.972214000  |
| 1  | 4.909462000  | -3.445194000 | 4.584538000  |
| 6  | 4.645410000  | 2.483851000  | -1.007279000 |
| 1  | 4.749037000  | 2.731453000  | -2.064082000 |
| 6  | 4.364860000  | 1.833028000  | 1.689720000  |
| 1  | 4.293842000  | 1.561873000  | 2.743700000  |
| 6  | 3.177589000  | -2.155873000 | 4.459388000  |
| 1  | 2.811088000  | -2.413962000 | 5.453496000  |
| 6  | 5.560815000  | 2.978579000  | -0.076835000 |
| 1  | 6.385529000  | 3.614539000  | -0.400383000 |
| 6  | -1.519590000 | 2.262438000  | 0.634494000  |
| 1  | -1.928342000 | 1.921342000  | -0.311607000 |
| 7  | 1.298776000  | 1.329308000  | 2.554893000  |
| 15 | 0.845656000  | -1.823887000 | -1.059375000 |
| 17 | 0.408336000  | 1.151067000  | -1.662620000 |
| 7  | -1.652513000 | -0.732858000 | -0.493797000 |
| 6  | 2.220814000  | -1.686719000 | -2.287142000 |
| 6  | 1.166730000  | -4.596413000 | -1.594048000 |
| 1  | 1.198897000  | -4.312592000 | -2.646588000 |
| 6  | -1.718363000 | -1.471307000 | -1.631034000 |
| 6  | 2.039613000  | -1.048813000 | -3.526635000 |
| 1  | 1.075526000  | -0.605785000 | -3.763693000 |
| 6  | 1.052152000  | -3.611846000 | -0.591223000 |
| 6  | -4.128074000 | -1.442576000 | -1.606488000 |
| 1  | -5.086986000 | -1.699045000 | -2.056739000 |
| 6  | 1.063067000  | -4.011352000 | 0.753101000  |
| 1  | 0.954262000  | -3.262040000 | 1.532719000  |
| 6  | -4.064742000 | -0.780641000 | -0.375066000 |
| 1  | -4.960470000 | -0.520770000 | 0.184693000  |
| 6  | 4.538194000  | -2.131574000 | -2.890155000 |
| 1  | 5.508131000  | -2.560593000 | -2.636907000 |
| 6  | -2.946286000 | -1.806921000 | -2.235631000 |
| 1  | -2.951922000 | -2.367157000 | -3.169201000 |
| 6  | 1.179177000  | -5.366014000 | 1.086055000  |
| 1  | 1.185726000  | -5.658186000 | 2.136527000  |
| 6  | 1.278711000  | -6.335502000 | 0.086752000  |
| 1  | 1.364089000  | -7.390403000 | 0.349782000  |
| 6  | 3.096853000  | -0.963599000 | -4.437514000 |
| 1  | 2.938367000  | -0.469368000 | -5.396592000 |
| 6  | 3.481197000  | -2.231279000 | -1.981985000 |
| 1  | 3.635982000  | -2.756005000 | -1.041054000 |
| 6  | 1.271823000  | -5.946672000 | -1.257927000 |
| 1  | 1.357734000  | -6.695083000 | -2.046534000 |
| 6  | 4.348944000  | -1.498727000 | -4.122219000 |
| 1  | 5.171776000  | -1.427500000 | -4.834118000 |
| 6  | -2.813351000 | -0.459849000 | 0.137366000  |
| 1  | -2.707382000 | 0.023060000  | 1.103927000  |
| 7  | -0.520698000 | -1.902445000 | -2.134266000 |
| 1  | -0.564788000 | -2.590800000 | -2.873983000 |
| 1  | 1.878063000  | 1.770987000  | 3.256449000  |

## DHS

|    |              |              |              |
|----|--------------|--------------|--------------|
| 26 | -0.100951000 | -0.449981000 | 0.160593000  |
| 15 | -1.180471000 | 2.262970000  | 1.194387000  |
| 17 | 0.465241000  | -2.623219000 | -0.413582000 |
| 7  | -0.341249000 | -0.476733000 | 2.401415000  |
| 6  | -2.812824000 | 3.044101000  | 0.793857000  |
| 6  | 0.093546000  | 4.026849000  | 3.087238000  |
| 1  | -0.118157000 | 3.281581000  | 3.853064000  |
| 6  | -1.178746000 | 0.272060000  | 3.151272000  |
| 6  | -3.544274000 | 2.601593000  | -0.321033000 |
| 1  | -3.160890000 | 1.781574000  | -0.922987000 |
| 6  | -0.292663000 | 3.788843000  | 1.758999000  |
| 6  | -1.209851000 | -1.391650000 | 4.905073000  |
| 1  | -1.564020000 | -1.742339000 | 5.874625000  |
| 6  | 0.025683000  | 4.752321000  | 0.781776000  |
| 1  | -0.257317000 | 4.587388000  | -0.258930000 |
| 6  | -0.319793000 | -2.158117000 | 4.143012000  |
| 1  | 0.046759000  | -3.123981000 | 4.483061000  |
| 6  | -4.584330000 | 4.644307000  | 1.284132000  |
| 1  | -4.982249000 | 5.443211000  | 1.910791000  |
| 6  | -1.640612000 | -0.170643000 | 4.413081000  |
| 1  | -2.328882000 | 0.451054000  | 4.984758000  |
| 6  | 0.681387000  | 5.933780000  | 1.132260000  |
| 1  | 0.907291000  | 6.674287000  | 0.364068000  |
| 6  | 1.038904000  | 6.172480000  | 2.464427000  |
| 1  | 1.543067000  | 7.099193000  | 2.739641000  |
| 6  | -4.780746000 | 3.178715000  | -0.627969000 |
| 1  | -5.337581000 | 2.821282000  | -1.494485000 |
| 6  | -3.343138000 | 4.080459000  | 1.587329000  |
| 1  | -2.778043000 | 4.468537000  | 2.434582000  |
| 6  | 0.748347000  | 5.213013000  | 3.437307000  |
| 1  | 1.031010000  | 5.384634000  | 4.476590000  |
| 6  | -5.305852000 | 4.195539000  | 0.173172000  |
| 1  | -6.272216000 | 4.639855000  | -0.067233000 |
| 6  | 0.072795000  | -1.658916000 | 2.908866000  |
| 1  | 0.726566000  | -2.233870000 | 2.254568000  |
| 7  | -1.576995000 | 1.511481000  | 2.703209000  |
| 15 | 2.588773000  | 0.233637000  | 0.374491000  |
| 17 | -2.421934000 | -0.670916000 | -0.141822000 |
| 7  | 0.440433000  | 0.672115000  | -1.672850000 |
| 6  | 3.319296000  | 1.171433000  | 1.775143000  |
| 6  | 3.842668000  | -1.896480000 | -0.965056000 |
| 1  | 2.824883000  | -2.239473000 | -1.148625000 |
| 6  | 1.571871000  | 1.376444000  | -1.890386000 |
| 6  | 3.629733000  | 0.432945000  | 2.934582000  |
| 1  | 3.434166000  | -0.638909000 | 2.968215000  |
| 6  | 4.058659000  | -0.746440000 | -0.184694000 |
| 6  | 0.867912000  | 1.943891000  | -4.127780000 |
| 1  | 1.041395000  | 2.448257000  | -5.078502000 |
| 6  | 5.380391000  | -0.331609000 | 0.071836000  |
| 1  | 5.571987000  | 0.548645000  | 0.683614000  |
| 6  | -0.285903000 | 1.179433000  | -3.918656000 |
| 1  | -1.041264000 | 1.056798000  | -4.691744000 |
| 6  | 4.154662000  | 3.172277000  | 2.876535000  |
| 1  | 4.348055000  | 4.244502000  | 2.849932000  |
| 6  | 1.808081000  | 2.043364000  | -3.110871000 |
| 1  | 2.725487000  | 2.614465000  | -3.249609000 |
| 6  | 6.460005000  | -1.052482000 | -0.444252000 |
| 1  | 7.477761000  | -0.721535000 | -0.234203000 |
| 6  | 6.237614000  | -2.194380000 | -1.220780000 |
| 1  | 7.082154000  | -2.758079000 | -1.618449000 |
| 6  | 4.203745000  | 1.057053000  | 4.042721000  |
| 1  | 4.441236000  | 0.468405000  | 4.929114000  |
| 6  | 3.575642000  | 2.551368000  | 1.764698000  |
| 1  | 3.308445000  | 3.150358000  | 0.896455000  |
| 6  | 4.929144000  | -2.611824000 | -1.477818000 |
| 1  | 4.745305000  | -3.505790000 | -2.074337000 |
| 6  | 4.474237000  | 2.429569000  | 4.015178000  |
| 1  | 4.925740000  | 2.916961000  | 4.879493000  |
| 6  | -0.453208000 | 0.571985000  | -2.680253000 |
| 1  | -1.336528000 | -0.020981000 | -2.444100000 |
| 7  | 2.510353000  | 1.443950000  | -0.873486000 |
| 1  | -2.304193000 | 1.939980000  | 3.261608000  |
| 1  | 3.392418000  | 1.844925000  | -1.172364000 |

## DLS

|    |              |              |              |
|----|--------------|--------------|--------------|
| 26 | 0.063134000  | 0.113429000  | 0.272110000  |
| 15 | -0.812029000 | 1.904372000  | 1.156395000  |
| 17 | 0.602830000  | -1.936953000 | -0.690524000 |
| 7  | -0.121452000 | -0.674875000 | 2.106371000  |
| 6  | -2.443960000 | 2.685127000  | 0.706471000  |
| 6  | 0.403958000  | 3.962147000  | 2.760850000  |
| 1  | 0.273049000  | 3.299773000  | 3.614385000  |
| 6  | -0.781169000 | 0.029975000  | 3.061800000  |
| 6  | -2.991096000 | 2.574740000  | -0.579549000 |
| 1  | -2.502191000 | 1.949503000  | -1.317387000 |
| 6  | 0.040776000  | 3.526284000  | 1.477699000  |
| 6  | -0.692181000 | -1.819260000 | 4.607536000  |
| 1  | -0.925235000 | -2.259747000 | 5.576904000  |
| 6  | 0.244097000  | 4.395095000  | 0.389138000  |
| 1  | -0.044868000 | 4.090752000  | -0.615965000 |
| 6  | 0.002668000  | -2.542087000 | 3.632175000  |
| 1  | 0.331264000  | -3.565446000 | 3.800293000  |
| 6  | -4.305161000 | 4.133276000  | 1.328629000  |
| 1  | -4.807509000 | 4.743036000  | 2.080111000  |
| 6  | -1.085155000 | -0.519125000 | 4.322263000  |
| 1  | -1.622955000 | 0.081744000  | 5.054107000  |
| 6  | 0.791978000  | 5.664219000  | 0.582300000  |
| 1  | 0.936424000  | 6.324579000  | -0.273512000 |
| 6  | 1.137290000  | 6.094310000  | 1.867963000  |
| 1  | 1.553433000  | 7.090420000  | 2.020636000  |
| 6  | -4.177344000 | 3.236854000  | -0.908034000 |
| 1  | -4.587132000 | 3.132982000  | -1.913053000 |
| 6  | -3.106034000 | 3.492431000  | 1.649412000  |
| 1  | -2.682186000 | 3.661638000  | 2.639509000  |
| 6  | 0.942730000  | 5.238558000  | 2.954191000  |
| 1  | 1.213536000  | 5.560648000  | 3.960221000  |
| 6  | -4.845763000 | 4.007540000  | 0.046140000  |
| 1  | -5.778152000 | 4.512027000  | -0.208161000 |
| 6  | 0.256348000  | -1.937019000 | 2.407640000  |
| 1  | 0.750275000  | -2.459322000 | 1.590329000  |
| 7  | -1.107256000 | 1.328941000  | 2.758670000  |
| 15 | 2.160234000  | 0.598633000  | 0.402841000  |
| 17 | -2.196309000 | -0.501819000 | 0.090754000  |
| 7  | 0.221092000  | 0.811202000  | -1.579637000 |
| 6  | 2.952023000  | 1.587101000  | 1.748907000  |
| 6  | 3.734078000  | -1.126118000 | -1.196463000 |
| 1  | 3.060615000  | -0.842836000 | -2.001108000 |
| 6  | 1.338742000  | 1.491001000  | -1.949365000 |
| 6  | 2.788781000  | 1.160202000  | 3.079216000  |
| 1  | 2.128914000  | 0.326141000  | 3.305075000  |
| 6  | 3.540676000  | -0.616882000 | 0.101726000  |
| 6  | 0.527718000  | 1.762290000  | -4.203782000 |
| 1  | 0.643139000  | 2.151957000  | -5.215043000 |
| 6  | 4.396698000  | -1.052846000 | 1.126735000  |
| 1  | 4.282722000  | -0.673998000 | 2.139557000  |
| 6  | -0.579463000 | 0.984042000  | -3.850555000 |
| 1  | -1.350268000 | 0.722065000  | -4.572263000 |
| 6  | 4.482104000  | 3.308885000  | 2.537707000  |
| 1  | 5.133958000  | 4.154932000  | 2.318593000  |
| 6  | 1.503698000  | 2.010949000  | -3.246686000 |
| 1  | 2.399708000  | 2.581109000  | -3.487630000 |
| 6  | 5.422270000  | -1.965632000 | 0.861174000  |
| 1  | 6.075640000  | -2.288131000 | 1.672414000  |
| 6  | 5.616672000  | -2.450298000 | -0.433798000 |
| 1  | 6.420332000  | -3.157163000 | -0.641647000 |
| 6  | 3.475279000  | 1.790546000  | 4.121476000  |
| 1  | 3.340066000  | 1.438340000  | 5.144637000  |
| 6  | 3.803289000  | 2.675071000  | 1.494367000  |
| 1  | 3.932224000  | 3.051174000  | 0.481746000  |
| 6  | 4.769256000  | -2.024993000 | -1.460979000 |
| 1  | 4.900330000  | -2.406613000 | -2.473815000 |
| 6  | 4.328190000  | 2.864249000  | 3.853822000  |
| 1  | 4.865542000  | 3.355402000  | 4.665324000  |
| 6  | -0.685264000 | 0.527634000  | -2.542137000 |
| 1  | -1.513696000 | -0.090072000 | -2.200252000 |
| 7  | 2.316289000  | 1.629518000  | -0.986617000 |
| 1  | -1.794764000 | 1.764516000  | 3.357612000  |
| 1  | 3.233315000  | 1.868617000  | -1.343554000 |



## EHS

|    |              |              |              |
|----|--------------|--------------|--------------|
| 26 | -0.374441000 | 0.189600000  | 0.398614000  |
| 15 | -1.198304000 | -1.161022000 | 2.410064000  |
| 17 | 1.317179000  | -1.280515000 | -0.028616000 |
| 7  | -0.696073000 | 1.731888000  | 2.033510000  |
| 6  | 0.043986000  | -1.788749000 | 3.615879000  |
| 6  | -3.367905000 | -2.623039000 | 1.413166000  |
| 1  | -3.192311000 | -2.057123000 | 0.500008000  |
| 6  | -1.619973000 | 1.480424000  | 2.988462000  |
| 6  | 0.779936000  | -2.938249000 | 3.272734000  |
| 1  | 0.593913000  | -3.443786000 | 2.326367000  |
| 6  | -2.549870000 | -2.404260000 | 2.536299000  |
| 6  | -1.824749000 | 3.825289000  | 3.506168000  |
| 1  | -2.281873000 | 4.637172000  | 4.072399000  |
| 6  | -2.785745000 | -3.137740000 | 3.714312000  |
| 1  | -2.143938000 | -2.997987000 | 4.583474000  |
| 6  | -0.828854000 | 4.085084000  | 2.556187000  |
| 1  | -0.474724000 | 5.093496000  | 2.355023000  |
| 6  | 1.325954000  | -1.618538000 | 5.675942000  |
| 1  | 1.539031000  | -1.095674000 | 6.608930000  |
| 6  | -2.224445000 | 2.517142000  | 3.733344000  |
| 1  | -2.985970000 | 2.281453000  | 4.475706000  |
| 6  | -3.830355000 | -4.063927000 | 3.769345000  |
| 1  | -4.003521000 | -4.628188000 | 4.686271000  |
| 6  | -4.643629000 | -4.273195000 | 2.650820000  |
| 1  | -5.454140000 | -5.001316000 | 2.694232000  |
| 6  | 1.764673000  | -3.426700000 | 4.132925000  |
| 1  | 2.326688000  | -4.318200000 | 3.854018000  |
| 6  | 0.333570000  | -1.128842000 | 4.820961000  |
| 1  | -0.214025000 | -0.227881000 | 5.093607000  |
| 6  | -4.409714000 | -3.552661000 | 1.476063000  |
| 1  | -5.037091000 | -3.714632000 | 0.599329000  |
| 6  | 2.040865000  | -2.769905000 | 5.336893000  |
| 1  | 2.815698000  | -3.149963000 | 6.002987000  |
| 6  | -0.309361000 | 3.009830000  | 1.845744000  |
| 1  | 0.462706000  | 3.148994000  | 1.092752000  |
| 7  | -1.937122000 | 0.166677000  | 3.241298000  |
| 15 | 0.646510000  | 1.718868000  | -1.637496000 |
| 17 | -2.476461000 | 0.416404000  | -0.514047000 |
| 7  | 2.783374000  | 2.411361000  | 0.369267000  |
| 6  | 0.296403000  | 1.010472000  | -3.308402000 |
| 6  | 1.093054000  | 4.517869000  | -2.022938000 |
| 1  | 2.155006000  | 4.280993000  | -2.045493000 |
| 6  | 3.269446000  | 1.886319000  | -0.765884000 |
| 6  | -0.062111000 | -0.344026000 | -3.417942000 |
| 1  | -0.166261000 | -0.950708000 | -2.521370000 |
| 6  | 0.154014000  | 3.485298000  | -1.866820000 |
| 6  | 5.481699000  | 1.703584000  | 0.158745000  |
| 1  | 6.531457000  | 1.421958000  | 0.071038000  |
| 6  | -1.216625000 | 3.804903000  | -1.830333000 |
| 1  | -1.955102000 | 3.016509000  | -1.689132000 |
| 6  | 4.984239000  | 2.242453000  | 1.353030000  |
| 1  | 5.623464000  | 2.398892000  | 2.219742000  |
| 6  | 0.205154000  | 1.205730000  | -5.732222000 |
| 1  | 0.304527000  | 1.815473000  | -6.630891000 |
| 6  | 4.625282000  | 1.515016000  | -0.917213000 |
| 1  | 4.983325000  | 1.081361000  | -1.850446000 |
| 6  | -1.632689000 | 5.131152000  | -1.969004000 |
| 1  | -2.697813000 | 5.363975000  | -1.946774000 |
| 6  | -0.692749000 | 6.154976000  | -2.129225000 |
| 1  | -1.021073000 | 7.189693000  | -2.232422000 |
| 6  | -0.279676000 | -0.914898000 | -4.675238000 |
| 1  | -0.559232000 | -1.966326000 | -4.745071000 |
| 6  | 0.423225000  | 1.782169000  | -4.478364000 |
| 1  | 0.682351000  | 2.837595000  | -4.409606000 |
| 6  | 0.669861000  | 5.844487000  | -2.152702000 |
| 1  | 1.410122000  | 6.636306000  | -2.274430000 |
| 6  | -0.146246000 | -0.144084000 | -5.833278000 |
| 1  | -0.320709000 | -0.591572000 | -6.812306000 |
| 6  | 3.630122000  | 2.567623000  | 1.395479000  |
| 1  | 3.191027000  | 2.985096000  | 2.305290000  |
| 7  | 2.381692000  | 1.764783000  | -1.817153000 |
| 1  | -2.667040000 | -0.002777000 | 3.920248000  |
| 1  | 2.735275000  | 1.299123000  | -2.642281000 |

## ELS

|    |              |              |              |
|----|--------------|--------------|--------------|
| 26 | -0.084270000 | 0.684453000  | 0.570937000  |
| 15 | -0.654327000 | -0.604499000 | 2.251979000  |
| 17 | 0.610538000  | -1.345376000 | -0.384353000 |
| 7  | -0.665622000 | 2.176794000  | 1.728281000  |
| 6  | 0.546620000  | -1.415196000 | 3.416962000  |
| 6  | -3.304013000 | -1.595048000 | 2.247080000  |
| 1  | -3.609336000 | -0.557208000 | 2.355495000  |
| 6  | -1.321836000 | 1.897672000  | 2.893244000  |
| 6  | 1.649985000  | -2.111349000 | 2.890504000  |
| 1  | 1.795271000  | -2.137399000 | 1.811147000  |
| 6  | -1.940676000 | -1.917792000 | 2.137131000  |
| 6  | -1.636416000 | 4.240616000  | 3.392606000  |
| 1  | -2.026872000 | 5.031261000  | 4.032650000  |
| 6  | -1.571474000 | -3.257998000 | 1.933365000  |
| 1  | -0.523924000 | -3.528520000 | 1.830815000  |
| 6  | -0.921775000 | 4.536304000  | 2.227560000  |
| 1  | -0.727741000 | 5.559405000  | 1.913342000  |
| 6  | 1.299261000  | -1.993023000 | 5.661107000  |
| 1  | 1.157788000  | -1.939371000 | 6.741132000  |
| 6  | -1.830661000 | 2.908200000  | 3.730414000  |
| 1  | -2.358315000 | 2.630067000  | 4.641601000  |
| 6  | -2.546710000 | -4.254403000 | 1.854087000  |
| 1  | -2.243524000 | -5.289092000 | 1.692669000  |
| 6  | -3.900161000 | -3.929846000 | 1.983034000  |
| 1  | -4.659345000 | -4.710419000 | 1.925841000  |
| 6  | 2.556155000  | -2.749899000 | 3.742629000  |
| 1  | 3.404456000  | -3.286488000 | 3.316369000  |
| 6  | 0.385655000  | -1.361536000 | 4.812976000  |
| 1  | -0.451006000 | -0.823553000 | 5.256588000  |
| 6  | -4.274461000 | -2.598127000 | 2.178407000  |
| 1  | -5.328064000 | -2.330828000 | 2.264011000  |
| 6  | 2.385199000  | -2.694409000 | 5.128351000  |
| 1  | 3.094958000  | -3.190355000 | 5.791043000  |
| 6  | -0.468286000 | 3.483904000  | 1.443510000  |
| 1  | 0.067014000  | 3.678870000  | 0.522586000  |
| 7  | -1.441805000 | 0.573391000  | 3.234252000  |
| 15 | 0.340754000  | 1.550451000  | -1.417039000 |
| 17 | -2.305524000 | 0.543686000  | -0.134460000 |
| 7  | 1.817373000  | 1.087560000  | 0.939390000  |
| 6  | 0.009344000  | 0.718259000  | -3.033863000 |
| 6  | 0.977274000  | 4.296218000  | -1.972984000 |
| 1  | 2.008952000  | 4.050231000  | -1.722703000 |
| 6  | 2.656010000  | 1.335814000  | -0.110996000 |
| 6  | -0.866175000 | -0.371754000 | -3.146326000 |
| 1  | -1.369656000 | -0.745000000 | -2.259377000 |
| 6  | -0.011123000 | 3.297673000  | -1.929917000 |
| 6  | 4.588214000  | 1.437620000  | 1.335309000  |
| 1  | 5.663263000  | 1.542859000  | 1.478398000  |
| 6  | -1.341798000 | 3.643937000  | -2.235237000 |
| 1  | -2.122581000 | 2.886293000  | -2.185769000 |
| 6  | 3.721990000  | 1.299556000  | 2.425510000  |
| 1  | 4.082344000  | 1.297582000  | 3.451713000  |
| 6  | 0.436374000  | 0.601905000  | -5.428871000 |
| 1  | 0.940584000  | 0.991499000  | -6.313757000 |
| 6  | 4.047411000  | 1.467379000  | 0.056887000  |
| 1  | 4.677484000  | 1.621417000  | -0.817865000 |
| 6  | -1.665783000 | 4.955007000  | -2.588630000 |
| 1  | -2.700204000 | 5.207451000  | -2.823714000 |
| 6  | -0.673592000 | 5.940591000  | -2.642335000 |
| 1  | -0.930069000 | 6.962587000  | -2.922495000 |
| 6  | -1.084755000 | -0.964867000 | -4.393612000 |
| 1  | -1.769517000 | -1.810005000 | -4.467618000 |
| 6  | 0.645052000  | 1.211044000  | -4.189551000 |
| 1  | 1.288431000  | 2.090198000  | -4.138892000 |
| 6  | 0.647355000  | 5.608042000  | -2.331344000 |
| 1  | 1.427644000  | 6.369315000  | -2.638622000 |
| 6  | -0.430895000 | -0.489914000 | -5.533081000 |
| 1  | -0.601678000 | -0.961351000 | -6.501509000 |
| 6  | 2.367361000  | 1.125983000  | 2.175379000  |
| 1  | 1.671918000  | 0.983849000  | 2.995471000  |
| 7  | 2.067222000  | 1.513555000  | -1.335279000 |
| 1  | -2.012414000 | 0.352776000  | 4.038401000  |
| 1  | 2.664033000  | 1.514359000  | -2.150395000 |
